# Supplementary material
Source: MDPI journal article supplement (https://www.mdpi.com/2673-7256/2/4/58)
Supplement: s1 [file s1]

# Application of Zirconia/Alumina Composite Oxide Ceramics as Photocatalysts for Removal of 2,4,6-Trichlorophenol from Water

Tatjana D. Vulić<sup>1</sup>, Milica V. Carević<sup>1</sup>, Nadica D. Abazović<sup>1</sup>, Tatjana B. Novaković<sup>2</sup>, Zorica D. Mojović<sup>2</sup> and Mirjana I. Čomor<sup>1,\*</sup>

<sup>1</sup> Vinča Institute of Nuclear Sciences, National Institute of RS, University of Belgrade, Mike Petrovića Alasa 12-14, 11000 Belgrade, Serbia

<sup>2</sup> Institute of Chemistry, Technology and Metallurgy-Department of Catalysis and Chemical Engineering, National Institute of RS, University of Belgrade, Njegoševa 12, 11000 Belgrade, Serbia

\* Correspondence: mirjanac@vin.bg.ac.rs

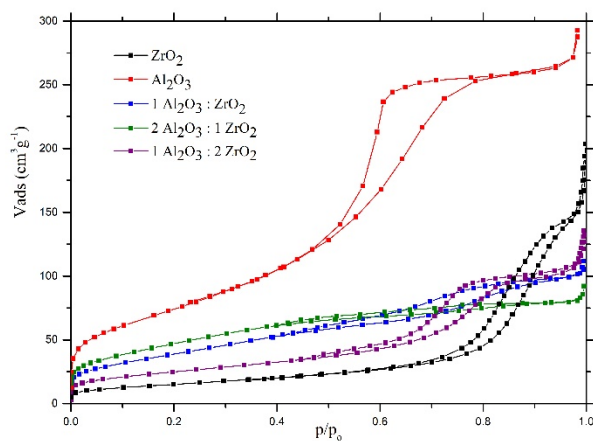

Figure S1. N<sub>2</sub>adsorption/desorption isotherms of all samples.

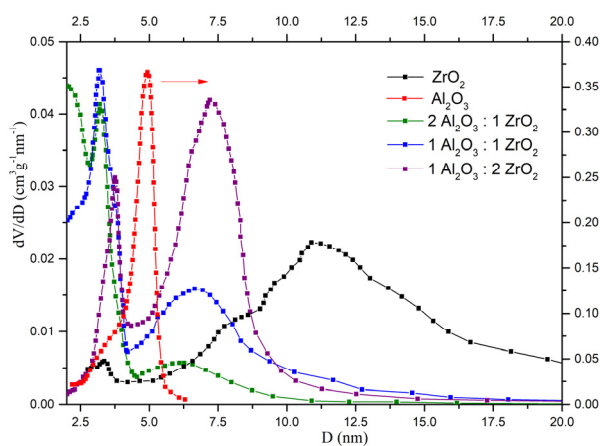

Figure S2. Pore size distributions patterns of all samples.

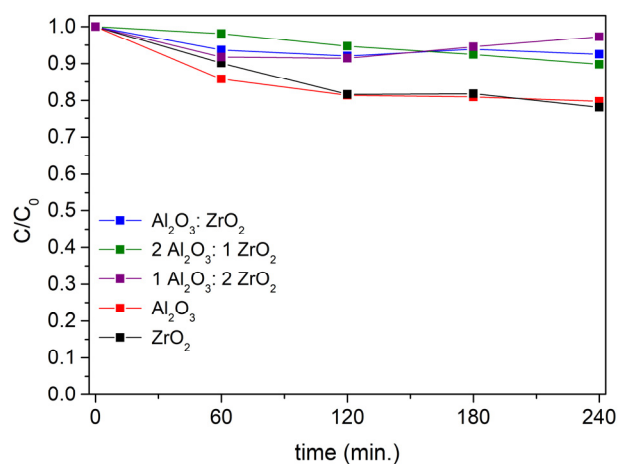

Figure S3. Kinetic curves TCP adsorption on composite samples, dark.

Table S1. Composition of pure zirconia powder, results obtained from SEM/EDX.

| Element | Line Type | Apparent Concentration |  | k Ratio | Wt%    | *Wt%   |          |
|---------|-----------|------------------------|--|---------|--------|--------|----------|
| O       | K series  | 3.81                   |  | 0.01284 | 18.15  | 24.51  | 1.53 mol |
| Zr      | L series  | 27.99                  |  | 0.27992 | 55.94  | 75.59  | 0.83 mol |
| Au      | M series  | 14.08                  |  | 0.14084 | 25.91  |        |          |
| Total:  |           |                        |  |         | 100.00 | 100.00 |          |

\* After subtraction of Au.

Table S2. Composition of pure alumina powder, results obtained from SEM/EDX.

| Element | Line Type | Apparent Concentration | k Ratio | Wt%    | *Wt%   |      |
|---------|-----------|------------------------|---------|--------|--------|------|
| C       | K series  | 0.36                   | 0.00355 | 17.07  |        |      |
| O       | K series  | 6.99                   | 0.02351 | 42.86  | 51.69  | 3.23 |
| Al      | K series  | 8.23                   | 0.05913 | 40.06  | 48.31  | 1.3  |
| Total:  |           |                        |         | 100.00 | 100.00 |      |

\*After subtraction of C.

Table S3. Composition of 2Al<sub>2</sub>O<sub>3</sub> : 1ZrO<sub>2</sub> nanocomposite powder, results obtained from SEM/EDX.

| Element | Line Type | Apparent Concentration | k Ratio | Wt%    | *Wt%   |      |
|---------|-----------|------------------------|---------|--------|--------|------|
| O       | K series  | 5.45                   | 0.01833 | 35.79  | 39.82  | 2.49 |
| Al      | K series  | 3.87                   | 0.02780 | 15.28  | 17.00  | 0.63 |
| Zr      | L series  | 9.46                   | 0.09460 | 38.81  | 43.18  | 0.47 |
| Au      | M series  | 2.71                   | 0.02706 | 10.13  |        |      |
| Total:  |           |                        |         | 100.00 | 100.00 |      |

\*After subtraction of Au

Table S4. Composition of 1Al<sub>2</sub>O<sub>3</sub> : 2ZrO<sub>2</sub> nanocomposite powder, results obtained from SEM/EDX.

| Element | Line Type | Apparent Concentration | k Ratio | Wt%    | *Wt%   |      |
|---------|-----------|------------------------|---------|--------|--------|------|
| O       | K series  | 2.42                   | 0.00815 | 16.31  | 21.21  | 1.32 |
| Al      | K series  | 1.25                   | 0.00895 | 3.97   | 5.16   | 0.2  |
| Zr      | L series  | 19.63                  | 0.19627 | 56.63  | 73.63  | 0.81 |
| Au      | M series  | 8.72                   | 0.08717 | 23.10  |        |      |
| Total:  |           |                        |         | 100.00 | 100.00 |      |

\*After subtraction of Au

Table S5. Results obtained in this study together with our previous results of photocatalytical degradation of TCP in aqueous solutions with similar zirconia based photocatalysts, after 4 hours of illumination by Simulated Solar light. High Performance Liquid Chromatography (HPLC) was used for measurement of TCP concentrations.

| sample                         | Crystal phase               | % of removed TCP from the solution, HPLC | reference  |
|--------------------------------|-----------------------------|------------------------------------------|------------|
| ZrO <sub>2</sub>               | Monocl./tetrag.             | 69.7                                     | This study |
| Al <sub>2</sub> O <sub>3</sub> | $\gamma$ -alumina           | 97.54                                    |            |
| 1Al:2Zr                        | Monocl./tetrag.             | 79.6                                     |            |
| Al:Zr                          | Tetragonal ZrO <sub>2</sub> | 80.70                                    |            |
| 2Al:1Zr                        | /                           | 81.70                                    |            |
|                                |                             |                                          |            |
| ZrO <sub>2</sub>               | Monocle./tetrag.            | 78.00                                    | [7]        |

|                                          |                 |       |     |
|------------------------------------------|-----------------|-------|-----|
| ZrO <sub>2</sub> -Si <sup>4+</sup>       | tetragonal      | 81.00 | [7] |
|                                          |                 |       |     |
| ZrO <sub>2</sub>                         | Monocl./terag.  | 67.50 | [8] |
| ZrO <sub>2</sub> -1%Fe <sup>3+</sup>     | Monocl./terag.  | 88    | [8] |
| ZrO <sub>2</sub> -5%Fe <sup>3+</sup>     | Monocl./terag.  | 81    | [8] |
| ZrO <sub>2</sub> -10%Fe <sup>3+</sup>    | Monocl./terag.  | 85    | [8] |
| ZrO <sub>2</sub> -20%Fe <sup>3+</sup>    | tetragonal      | 90    | [8] |
|                                          |                 |       |     |
| ZrO <sub>2</sub>                         | teragonal       | 76.08 | [9] |
| TiO <sub>2</sub>                         | Anatase/B       | 67.55 | [9] |
| 75%TiO <sub>2</sub> -25%ZrO <sub>2</sub> | Anatase/terag.  | 74.84 | [9] |
| 50%TiO <sub>2</sub> -50%ZrO <sub>2</sub> | Anatase/tetrag. | 68.00 | [9] |
| 25%TiO <sub>2</sub> -75%ZrO <sub>2</sub> | Anatase/tetrag. | 59.68 | [9] |
